# Supplementary material for: Nanoplating of a SnO2 thin-film on MXene-based sponge for stable and efficient solar energy conversion
Source: Royal Society of Chemistry journal article supplement (doi:10.1039/d0ta01258k), 2020-01-01
Supplement: d0ta01258k1.pdf [file d0ta01258k1.pdf]

# Supporting Information

## **Nanoplatinating SnO<sub>2</sub> thin-film on MXene-based sponge for stable and efficient solar energy conversion**

Qi Zhang<sup>1</sup>, Ze Fu<sup>2</sup>, Hongtao Yu<sup>1</sup>, Shuo Chen<sup>1\*</sup>

<sup>1</sup>Key Laboratory of Industrial Ecology and Environmental Engineering (Ministry of Education, China), School of Environmental Science and Technology, Dalian University of Technology, Dalian 116024, China.

<sup>2</sup>School of Fisheries and Life Science, Dalian Ocean University, Dalian 116023, China.

E-mail: shuochen@dlut.edu.cn

Qi Zhang and Ze Fu contributed equally to this work.

## 1. Experimental

### 1.1 Synthesis of $\text{Ti}_3\text{C}_2$ .

$\text{Ti}_3\text{C}_2$  (MXene) nanosheets solution was prepared by the following fabricating manufacturing procedures: Firstly, 0.5 g LiF powder was slowly added into a pre-configured 10 mL 9M HCl solution. Secondly, 0.5 g of the MAX phase precursor ( $\text{Ti}_3\text{AlC}_2$ ) powder was added to the above mixed solution in multiple portions, and then the Al layer was etched at 35 °C with magnetic stirring for 24 h. Thirdly, the product was washed with water and centrifuged for several times until the pH > 6. Fourthly, the above product was sonicated under ice bath and an Ar atmosphere conditions for 1 h. Finally, after centrifugation for another 1 h at 3500 rpm, the dark green supernatant of MXene nanosheet was collected. The concentration of  $\text{Ti}_3\text{C}_2$  nanosheet dispersion was determined through filtering a certain volume of the suspension and measuring the weight of the film after vacuum drying.

### 1.2 Synthesis of SPM.

The 3D porous MXene-based sponge (SPM) was prepared by a facile coating and calcination method. Typically, the MXene-coated sponge was fabricated by coating MXene nanosheets onto the skeleton of a sponge by a simple solution dipping-drying method. Typically, the commercial sponge (Wood pulp sponge, Germany) was carefully dipped into  $\text{Ti}_3\text{C}_2$  solution ( $2 \text{ mg}\cdot\text{mL}^{-1}$ ) for 24 h. The effect of the loading concentration of  $\text{Ti}_3\text{C}_2$  (0.5, 1.0, 1.5, 2.0 and  $2.5 \text{ mg}\cdot\text{mL}^{-1}$ ) on the evaporation performance was investigated systematically, as shown in Fig. S20 and S21. MXene-coated sponge was freeze-dried overnight. Subsequently, the MXene-coated sponge was transferred in a ceramic boat and placed into a temperature-programmed furnace under Ar flow, heated from room temperature to 800 °C in 3 h, and then kept at 800 °C for 2 h and cooled down to room temperature, named as  $\text{SPM}_{800}$ . The SPMs under the different calcination temperatures (300, 500, 800 and 1000 °C) were fabricated, named as  $\text{SPM}_{300}$ ,  $\text{SPM}_{500}$ ,  $\text{SPM}_{800}$  and  $\text{SPM}_{1000}$ , respectively.

### 1.3 Synthesis of SnO<sub>2</sub>-SPM.

6.78g of SnCl<sub>2</sub>•2H<sub>2</sub>O was dissolved in 50 mL of ethanol solution, backflow and stir for 4 h in a three-necked flask at 80 °C. Subsequently, the heating is stopped, and the solution was sealed and placed at room temperature for 24 h to obtain a uniform and transparent pale yellow SnO<sub>2</sub> sol. The SnO<sub>2</sub>-SPM was obtained by coating SnO<sub>2</sub> sol on the SPM using a dip-coating process. A dip coater (SYDC-100, Shanghai SAN-YAN Technology Co., Ltd, China) was used for coating SnO<sub>2</sub> sol on the SPM. The dipping time was set to 30 min and the lifting speed was 1 mm•s<sup>-1</sup>. Here, the impregnation of SPM with SnO<sub>2</sub> sol was repeated 1, 3 or 5 times. The final products were calcined at 500 °C for 2 h with a heating/cooling rate of 2 °C•min<sup>-1</sup>, named as SnO<sub>2</sub>-SPM. The SnO<sub>2</sub> layer thickness of SnO<sub>2</sub>-SPMs repeated 1, 3 and 5 impregnation times was 2.1, 5.6 and 11.2 nm, respectively, evaluated by the TEM images, named as SnO<sub>2</sub>-SPM<sub>2.1</sub>, SnO<sub>2</sub>-SPM<sub>5.6</sub> and SnO<sub>2</sub>-SPM<sub>11.2</sub>, respectively.

### 1.4 Characterization.

Transmission electron microscopy (TEM, JEM-2100F) and scanning electron microscopy (SEM, Quanta 200 FEG) was used to analyze the morphology of the samples. The crystallinity of the samples was determined by X-ray diffractometer (XRD, EMPYREAN, PANalytical) using a diffractometer with Cu K $\alpha$  radiation. Fourier transform infrared spectrum (FTIR) of the sample was obtained on KBr pellets on a spectrometer (Nicolet, Madison). X-ray photoelectron spectroscopy (XPS, VG ESCALAB250) was carried to analyze the elementary composition of samples. The optical transmittance and reflectance spectra of the surfaces of samples were recorded in the range of 200–2500 nm with a ultraviolet–visible–near-infrared spectrophotometer (UV-vis NIR spectra) equipped with an integrating sphere. The absorption efficiency was then calculated by  $A = 1 - R - T$ , where R and T are the reflection and transmission efficiency, respectively. FLUKE Ti 45 infrared camera was used to take infrared photographs. The mechanical strength of the samples was measured using a universal testing machine (AGS-X, Shimadzu Ltd., Japan). Water contact

angle of samples was tested on an optical contact angle & interface tension meter (SL200KB, Kino, USA).

### **1.5 Experimental Setup for Steam Generation.**

The steam generation experiments were performed under a homemade optical system, with a solar simulator (KGS-40S3-TT, AM1.5). In the experiment, the water was contained by a chamber and the SnO<sub>2</sub>-SPMs floated on the surface of the water. The mass change was measured by a balance (BSA3202S Max 3200g d=0.01g, Sartorius) for the evaluation of the evaporation rate and solar-thermal conversion efficiency. The four actual seawaters around China (Yellow sea, Bohai sea, East China sea and South China sea) and four salt waters from lakes in Tibet of China were taken for steam generation tests. During cycling test, after each cycle, the crystalline salt would be washed out and then the absorber would be dried in the air to simulate the actual use.

### **1.6 Water transport measurements.**

The completely dried samples of SnO<sub>2</sub>-SPM were immersed in DI water at room temperature. The weight of these samples was carefully tracked during the swollen process until they were fully hydrated. The record data from dried state to fully-hydrated was used to evaluate the water transport in SnO<sub>2</sub>-SPMs.

### **1.7 Water evaporation performance under one-sun irradiation.**

The water evaporation rate was calculated by the following equation:

$$v = \frac{d\dot{m}}{s \times dt}$$

where  $\dot{m}$  is the mass flux,  $s$  is the illuminated area,  $t$  is time, and  $v$  is evaporation rate.

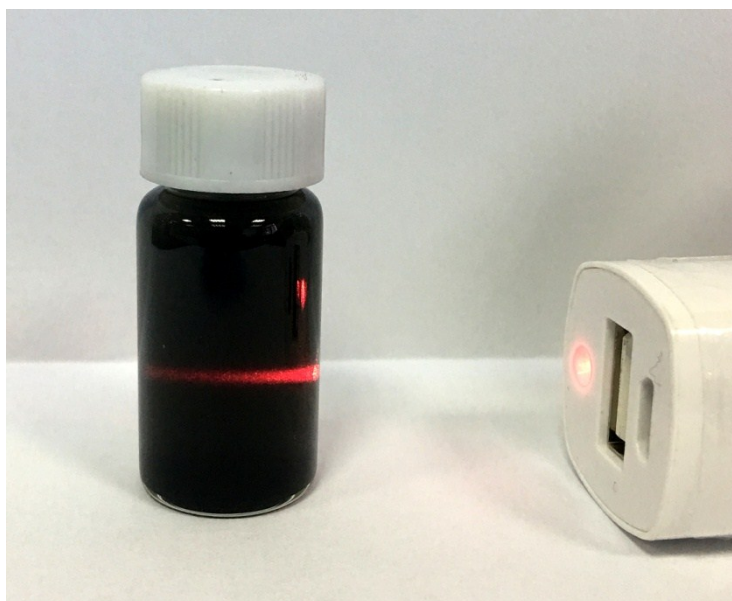

**Fig. S1** The Tyndall effect of MXene solution.

The stable MXene nanosheet solution was prepared by etching the  $\text{Ti}_3\text{AlC}_2$  precursor (MAX phase) with a mixture solution of LiF and HCl. The finally prepared  $\text{Ti}_3\text{C}_2$  nanosheets aqueous solution showed good dispersibility, which is proved by the apparent Tyndall scattering effect of the red laser passing through the solution (Fig. S1).

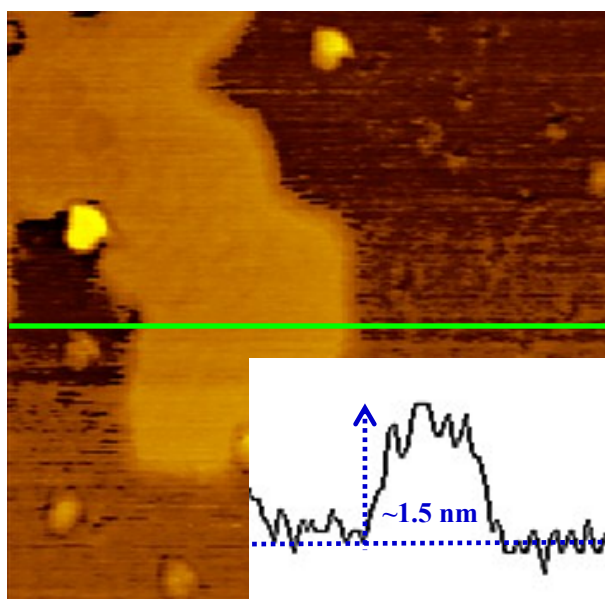

**Fig. S2** AFM image and its height profile of MXene nanosheets.

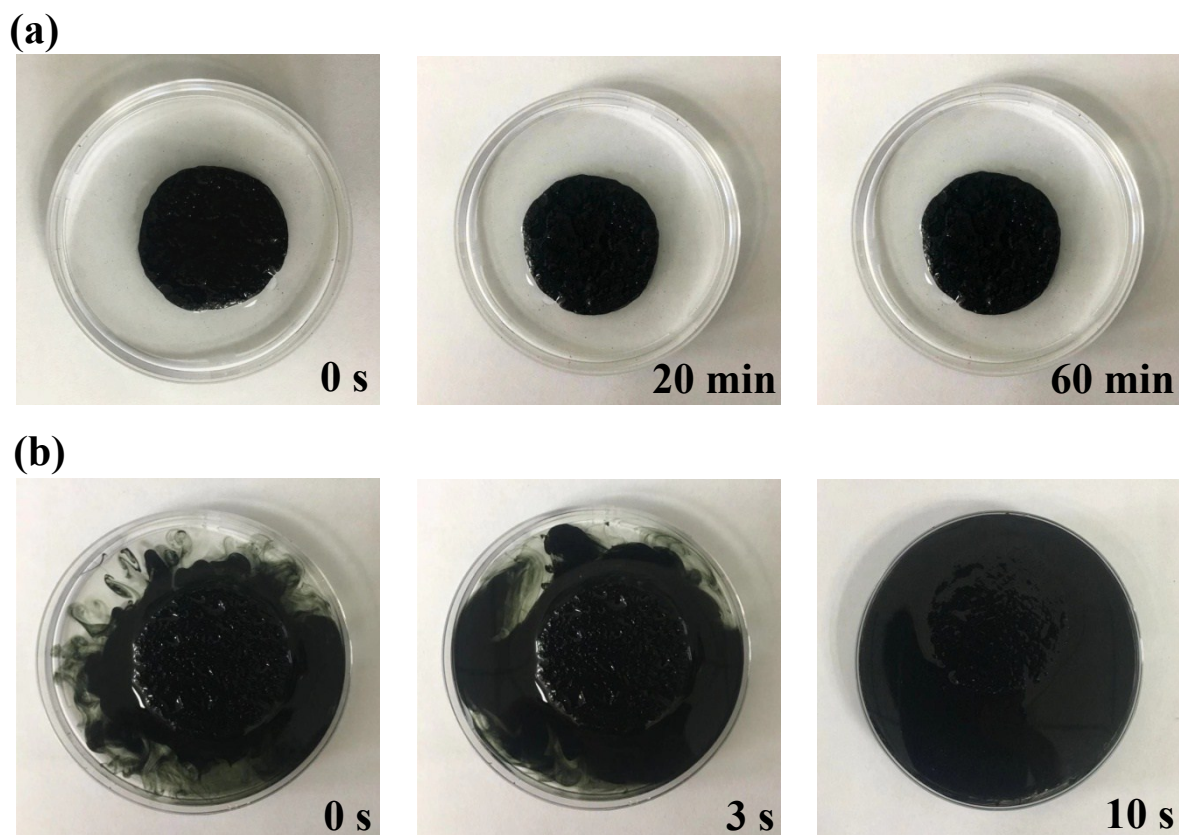

**Fig. S3** Digital photographs of (a) the calcined MXene-coated sponge and (b) MXene-coated sponge without calcination soaked in water for some time.

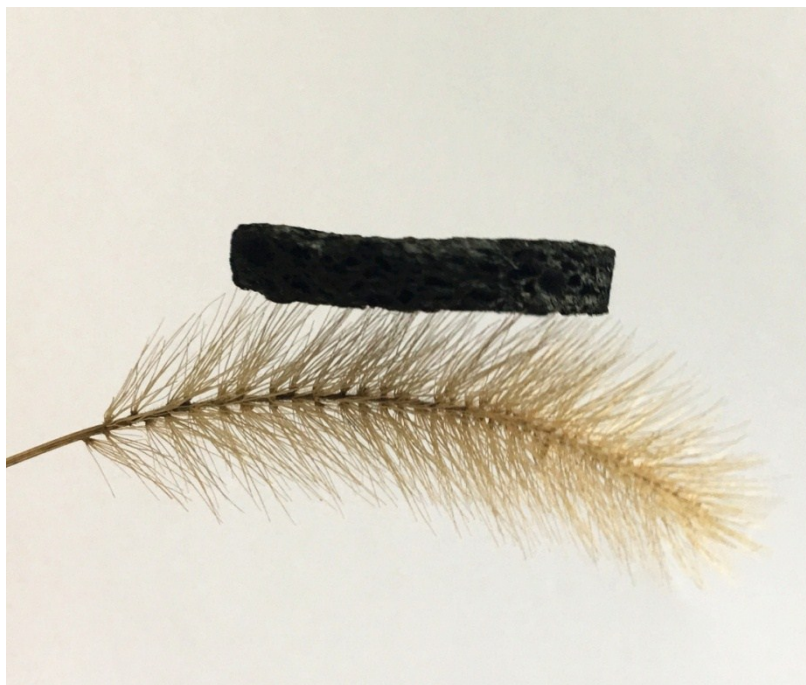

**Fig. S4** Photograph of SnO<sub>2</sub>-SPM on a fragile *setaria viridis*, showing the ultralight performance of the synthesized SnO<sub>2</sub>-SPM.



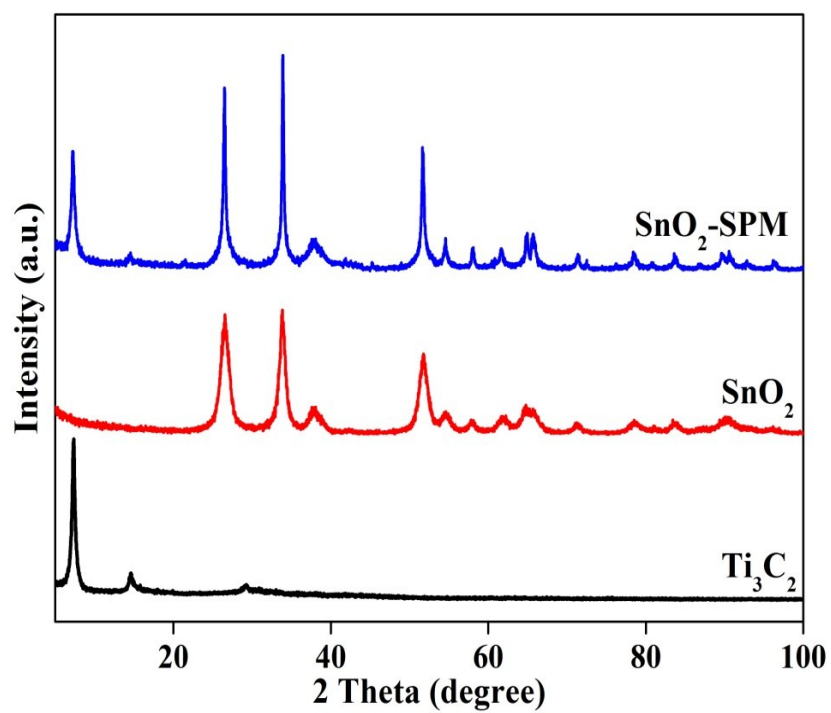

**Fig. S5** XRD patterns of Ti<sub>3</sub>C<sub>2</sub>, SnO<sub>2</sub> and SnO<sub>2</sub>-SPM.

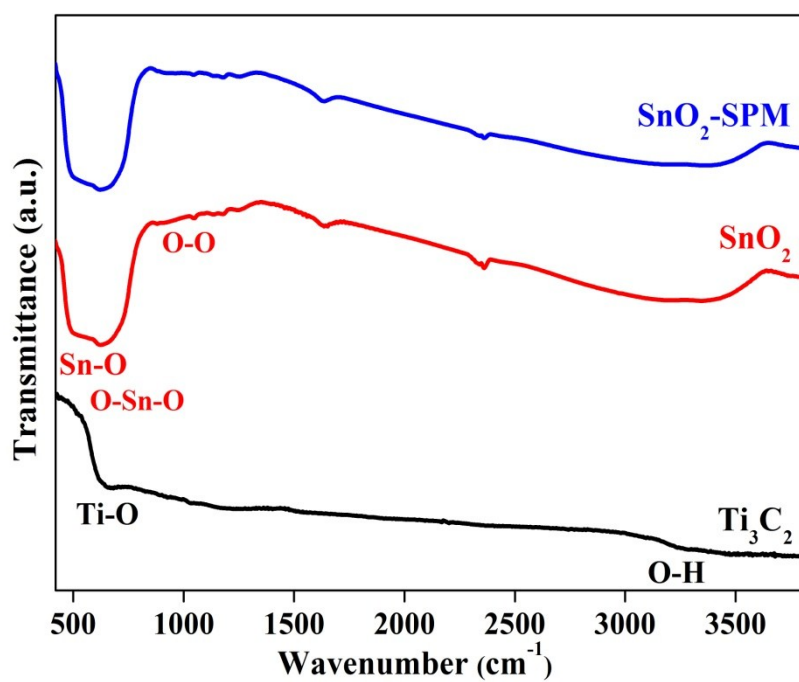

**Fig. S6** FT-IR spectra of Ti<sub>3</sub>C<sub>2</sub>, SnO<sub>2</sub> and SnO<sub>2</sub>-SPM.

Solar absorbers should have the efficient light absorption, which promotes light-water-steam production. Therefore, the thickness of SnO<sub>2</sub> layer nanoplatelet SPMs played an important role in the photothermal conversion of SnO<sub>2</sub>-SPMs, because too thick SnO<sub>2</sub> layer was adverse to the light absorption and the heat transport from Ti<sub>3</sub>C<sub>2</sub> to the top surface of SnO<sub>2</sub>-SPM. The thickness of SnO<sub>2</sub> layer on SPM can be regulated by changing the coating times (see Method 1.3 ). As shown in Fig. S7, when the impregnation of SPM with SnO<sub>2</sub> sol was repeated 1, 3 or 5 times, the SnO<sub>2</sub> layer thickness was ~2.1, ~5.6 and ~11.2 nm for the SnO<sub>2</sub>-SPM<sub>2.1</sub>, SnO<sub>2</sub>-SPM<sub>5.6</sub> and SnO<sub>2</sub>-SPM<sub>11.2</sub>, respectively. The absorption of SnO<sub>2</sub>-SPMs with different SnO<sub>2</sub> layer thickness was carefully measured with an UV-vis NIR spectra equipped with an integrating sphere. As displayed in Fig. S8, the averaged absorption (weighted by AM1.5G solar spectrum) across 200–2500 nm is ~95% for SnO<sub>2</sub>-SPM<sub>2.1</sub>, which laid foundations for efficient solar vapour production. However, the absorption gradually decreased from ~95% (SnO<sub>2</sub>-SPM<sub>2.1</sub>) to ~88% (SnO<sub>2</sub>-SPM<sub>11.2</sub>) with the thickness increasing of SnO<sub>2</sub> layer. Besides, Figure S9 indicated that the surface temperature of SnO<sub>2</sub>-SPMs decreased from 44.8 to 33.5 °C once the thickness of SnO<sub>2</sub> layer was increased from 2.1 to 11.2 nm after irradiation time of 600 s.

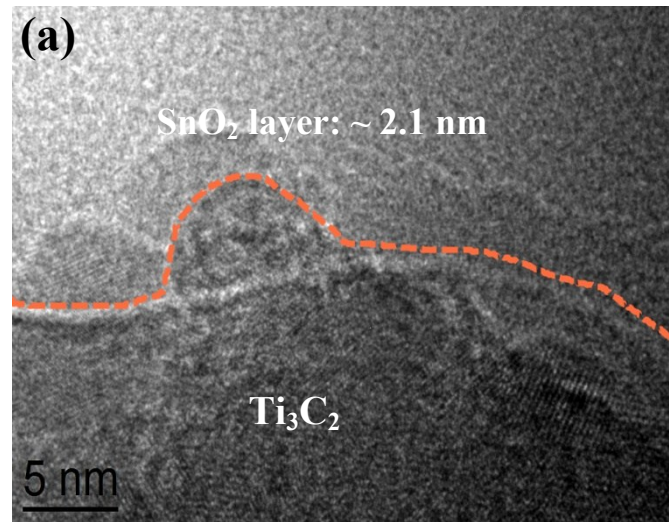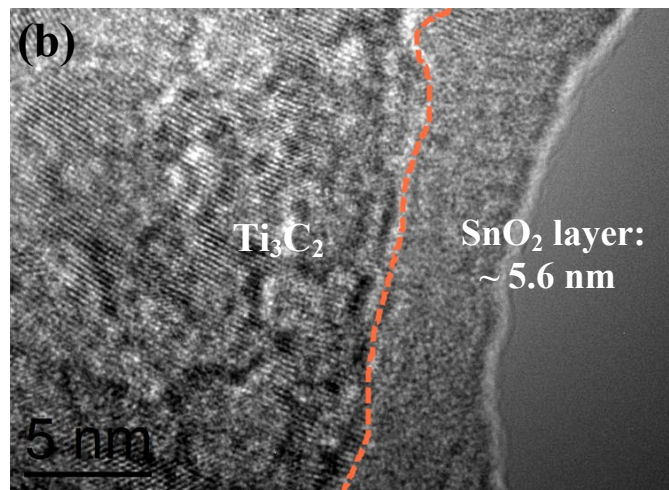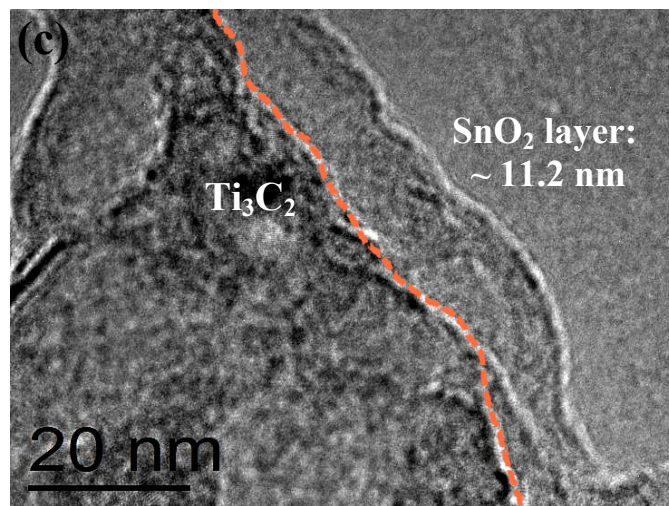

**Fig. S7** TEM images of SnO<sub>2</sub>-SPM samples with different SnO<sub>2</sub> layer thicknesses.

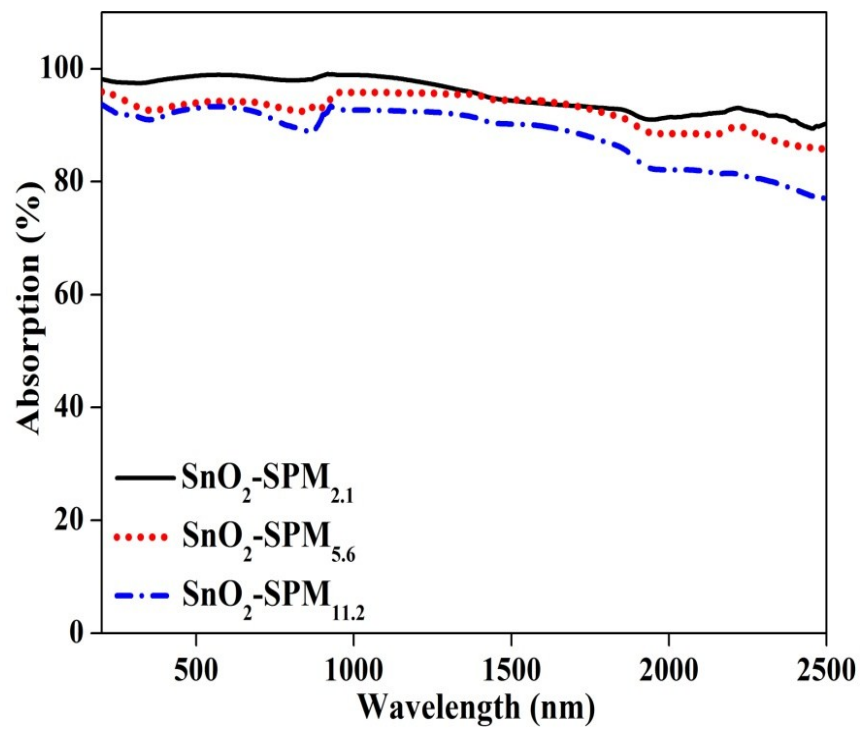

**Fig. S8** UV-vis NIR spectra of SnO<sub>2</sub>-SPM absorbers with different SnO<sub>2</sub> layer thickness.

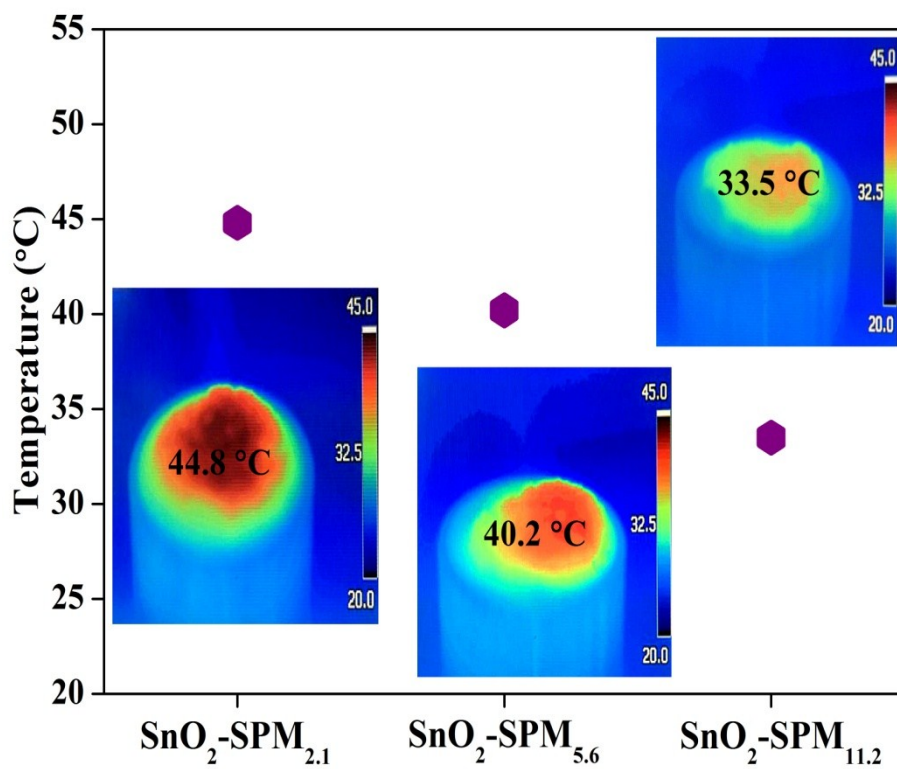

**Fig. S9** The surface temperature of SnO<sub>2</sub>-SPM samples at 600 s; Inset: infrared images showing the temperature distribution of SnO<sub>2</sub>-SPM samples after irradiation time of 600 s.

### **Optimization of SnO<sub>2</sub>-SPM calcination temperature.**

Water transport in internal gaps and micron channels was highly dependent on the capillary pumping, while the porous structure and hydrophilicity had become particularly important for capillarity. Apart from offering water transporting channels, the porous network structure was also beneficial to reducing the thermal conductivity. The low thermal conductivity was favorable to heating the localized water, which was significant for efficient solar vapour production. Herein, the nanostructure was tuned by controlling calcination temperature and thus regulating the water content and transport in the SnO<sub>2</sub>-SPMs with the optimized calcination temperature of 800 °C (Fig. S10–12). SnO<sub>2</sub>-SPMs with calcination temperature of 300, 500, 800 and 1000 °C were prepared (designated as SnO<sub>2</sub>-SPM<sub>300</sub>, SnO<sub>2</sub>-SPM<sub>500</sub>, SnO<sub>2</sub>-SPM<sub>800</sub> and SnO<sub>2</sub>-SPM<sub>1000</sub>, respectively) to investigate the water transport of structure-dependence. The water evaporation rate of SnO<sub>2</sub>-SPMs gradually increased and the hierarchical pore structure in SnO<sub>2</sub>-SPMs was increasingly obvious with the increasing of calcination temperature from 300 to 1000 °C (Fig. S10 and S11). Additionally, the size of their micron channels also varied with the calcination temperature (Fig. S11), which resulted in the different mechanical properties. Experimental results in Fig. S12 showed that the mechanical strength of the SnO<sub>2</sub>-SPMs decreased gradually with the calcination temperature from 300 to 1000 °C. The mechanical property further evidenced such difference among SnO<sub>2</sub>-SPMs when the calcination temperature was changed.

The optimized calcination temperature of SnO<sub>2</sub>-SPM is 800 °C in this work. An optimized calcination temperature can enable the accelerated solar vapor generation and reduce the cost of SnO<sub>2</sub>-SPMs. As shown below, solar vapor generation of the control samples with SnO<sub>2</sub>-SPM calcination temperature of 300, 500, 800 and 1000 °C, designating as SnO<sub>2</sub>-SPM<sub>300</sub>, SnO<sub>2</sub>-SPM<sub>500</sub>, SnO<sub>2</sub>-SPM<sub>800</sub> and SnO<sub>2</sub>-SPM<sub>1000</sub>, respectively, were tested under one sun. Fig. S10 shows that SnO<sub>2</sub>-SPM<sub>800</sub> has a higher evaporation rate compared with

$\text{SnO}_2\text{-SPM}_{300}$  and  $\text{SnO}_2\text{-SPM}_{500}$ . In addition, it could be found the evaporation rate of  $\text{SnO}_2\text{-SPM}_{1000}$  was only slightly higher than that of  $\text{SnO}_2\text{-SPM}_{800}$ .

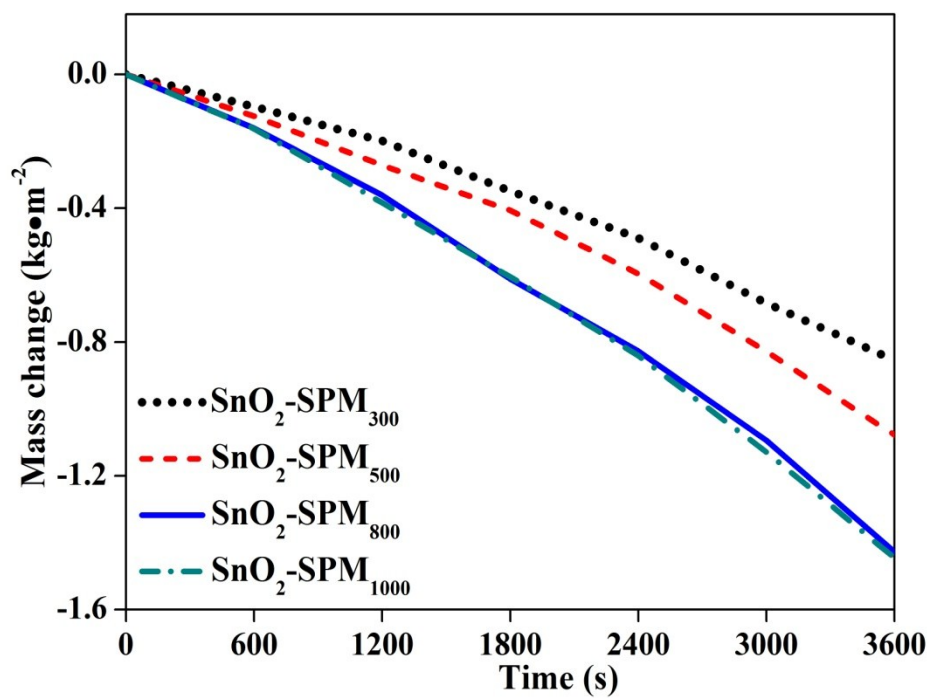

**Fig. S10** Mass change over time with  $\text{SnO}_2\text{-SPM}_{300}$ ,  $\text{SnO}_2\text{-SPM}_{500}$ ,  $\text{SnO}_2\text{-SPM}_{800}$  and  $\text{SnO}_2\text{-SPM}_{1000}$ .



As shown in Fig. S11, the size of micro-channels of SnO<sub>2</sub>-SPMs gradually enlarged with the increase of calcination temperature. The SnO<sub>2</sub>-SPM<sub>800</sub> and SnO<sub>2</sub>-SPM<sub>1000</sub> exhibited the large micro-channels, while the SnO<sub>2</sub>-SPM<sub>300</sub> and SnO<sub>2</sub>-SPM<sub>500</sub> only provide the small micro-channels. In addition, it can be also found that the internal gaps of SnO<sub>2</sub>-SPM disappeared when the calcination temperature was up to 1000 °C. Thus, the calcination temperature of SnO<sub>2</sub>-SPMs should be at 800 °C to achieve the hierarchical nanostructure. This hierarchical nanostructure was beneficial to the water vapor transport.

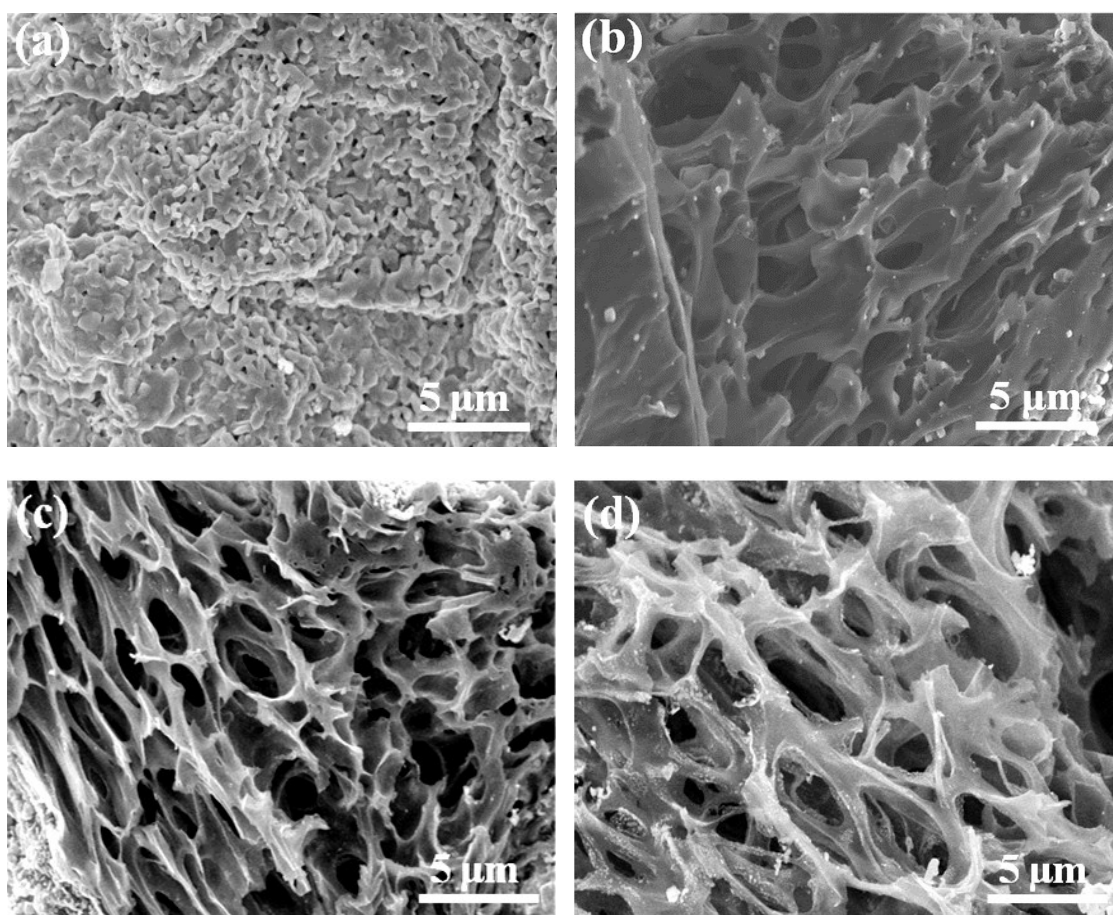

**Fig. S11** SEM images of (a) SnO<sub>2</sub>-SPM<sub>300</sub>, (b) SnO<sub>2</sub>-SPM<sub>500</sub>, (c) SnO<sub>2</sub>-SPM<sub>800</sub> and (d) SnO<sub>2</sub>-SPM<sub>1000</sub>, showing the micron channel structure with different size.

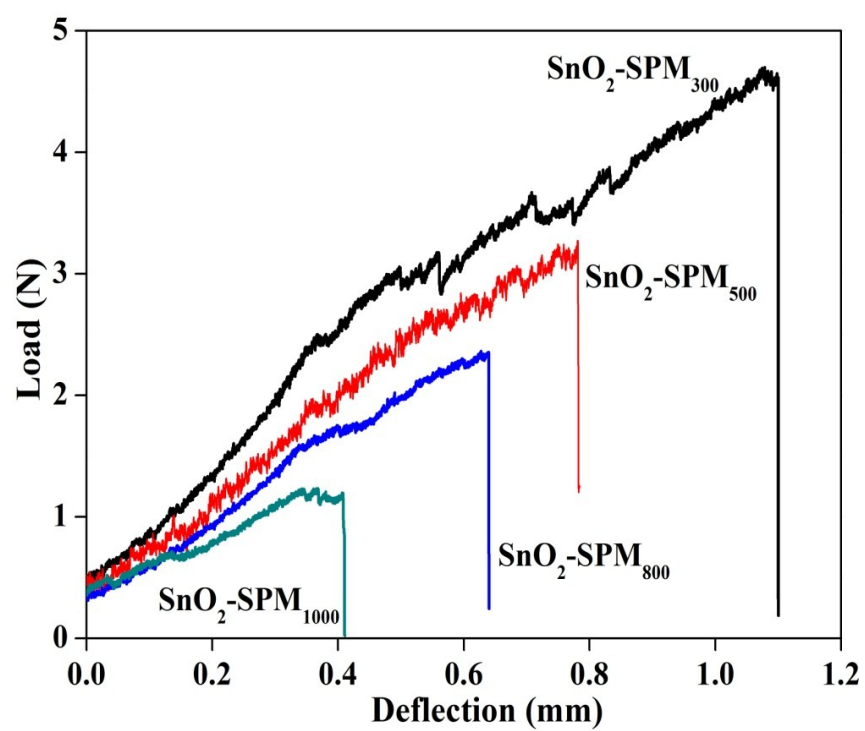

Fig. S12 Mechanical properties of SnO<sub>2</sub>-SPMs.

The water content ( $Q$ ) was calculated with the water mass in the fully swollen absorber divided of corresponding dried mass of absorber. The saturated water content ( $Q_s$ ) of SnO<sub>2</sub>-SPM<sub>800</sub> was  $\sim 10 \text{ g}\cdot\text{g}^{-1}$ , which was  $\sim 1.6$  and  $\sim 3.4$  times those of the SnO<sub>2</sub>-SPM<sub>500</sub> and SnO<sub>2</sub>-SPM<sub>300</sub>, respectively, suggesting that a wide range of  $Q_s$  could be obtained *via* changing the calcination temperature (Fig. S13a). Here it could be found the  $Q_s$  value of SnO<sub>2</sub>-SPM<sub>1000</sub> was only slightly higher than that of SnO<sub>2</sub>-SPM<sub>800</sub>. The water transport in SnO<sub>2</sub>-SPMs was evaluated by the analysis of the water-uptake dynamic process. The water-uptake time from fully dried state to saturated state revealed the water transport in the SnO<sub>2</sub>-SPMs (Fig. S13b). Since the  $Q$  values of all SnO<sub>2</sub>-SPM samples showed a linear dependence on time during the water-uptake, a water transport rate ( $V$ ) was defined as water absorption per minute. The SnO<sub>2</sub>-SPM<sub>300</sub>, SnO<sub>2</sub>-SPM<sub>500</sub>, SnO<sub>2</sub>-SPM<sub>800</sub> and SnO<sub>2</sub>-SPM<sub>1000</sub> showed  $V$  value of 0.016, 0.73, 0.17 and 0.18  $\text{g}\cdot\text{min}^{-1}$ , respectively (Fig. S13b), indicating that the  $V$  value was affected by the nanostructured channels.

Hydrophilicity was vital for pumping seawater to the hot surface of absorbers by capillarity, thus, the water contact angle was determined to investigate the wetting property of SnO<sub>2</sub>-SPMs. Due to the fast permeating of water into SnO<sub>2</sub>-SPMs, the water permeating time, defined as the water droplet from just contacting the SnO<sub>2</sub>-SPM surface to fully permeate into the SnO<sub>2</sub>-SPM interior, was used to represent the hydrophilicity of SnO<sub>2</sub>-SPMs with different calcination temperature. With the increase of calcination temperature, the water permeating time of SnO<sub>2</sub>-SPM absorbers gradually decreased from 801 to 327 ms, as shown in Fig. S13c. Hence, water can quickly permeate and pass through the interconnected pores of SnO<sub>2</sub>-SPM absorbers, thereby insuring the sufficient supply of water during vapour generation.

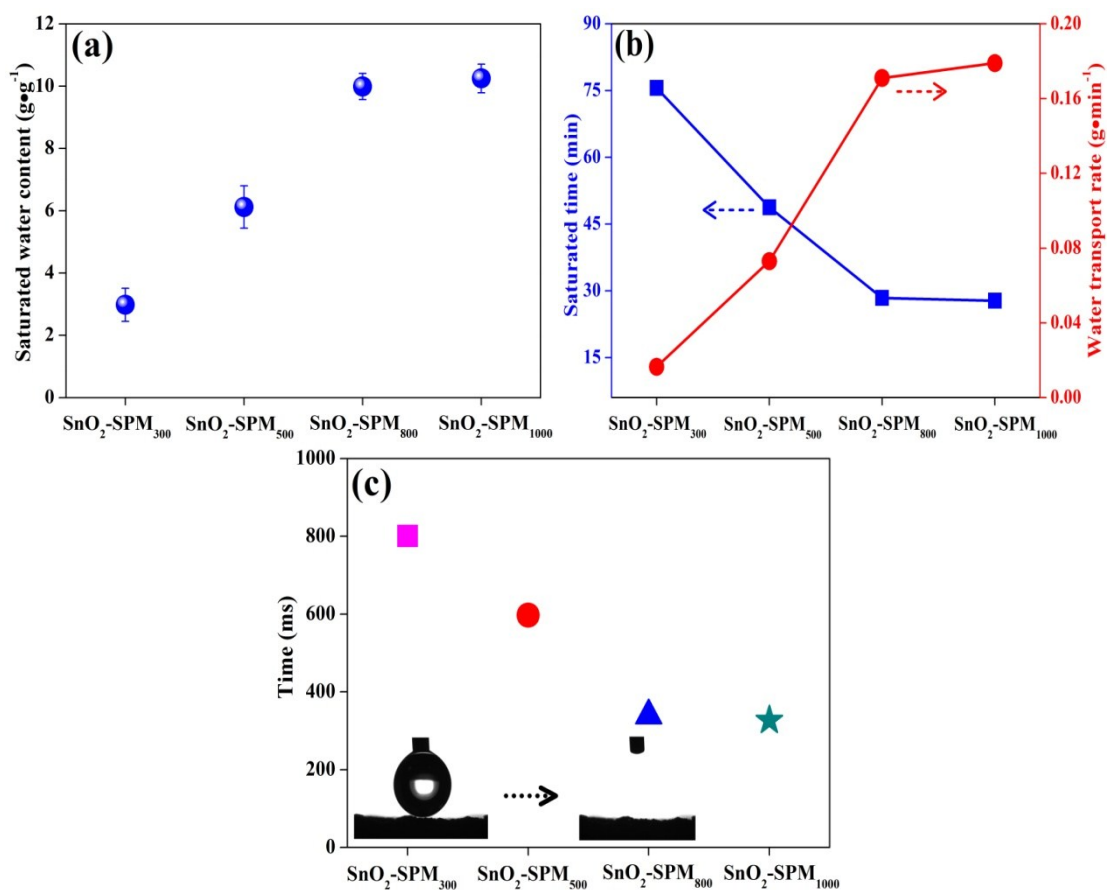

**Fig. S13** (a) Saturated water content in SnO<sub>2</sub>-SPMs per gram of corresponding dried samples; (b) Swollen behaviour from the fully dried state to the saturated state and the calculated water transport rate showing the tunable water transport ability of the SnO<sub>2</sub>-SPM<sub>300</sub>, SnO<sub>2</sub>-SPM<sub>500</sub>, SnO<sub>2</sub>-SPM<sub>800</sub> and SnO<sub>2</sub>-SPM<sub>1000</sub> represent absorbers with calcination temperature of 300, 500, 800 and 1000 °C, respectively; (c) Time variations of water droplet from just contacting SnO<sub>2</sub>-SPM surface to fully permeate into SnO<sub>2</sub>-SPM interior.

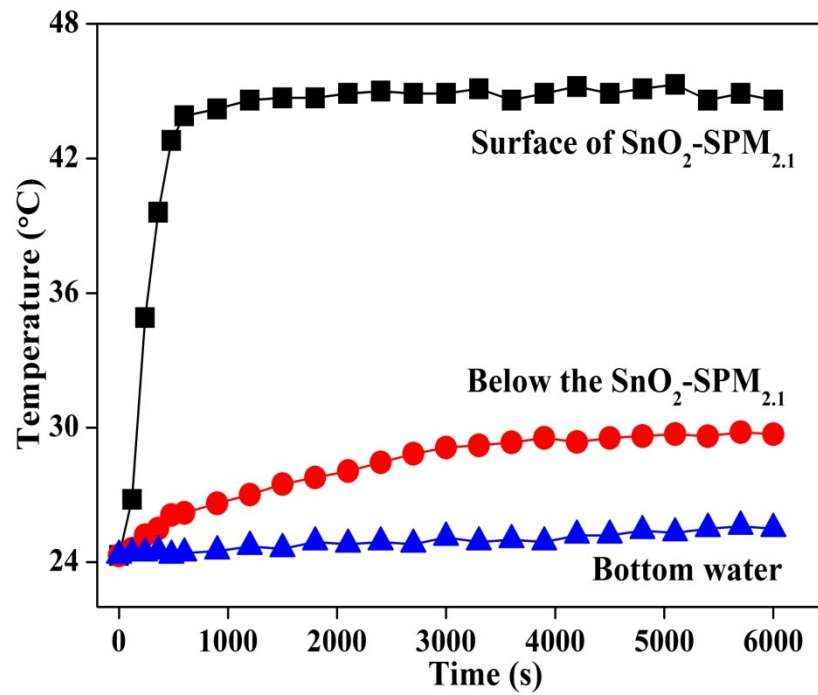

**Fig. 14** The temperature rise of bottom water, below surface the SnO<sub>2</sub>-SPM<sub>2.1</sub>, and top surface of SnO<sub>2</sub>-SPM<sub>2.1</sub> in the cuvette.

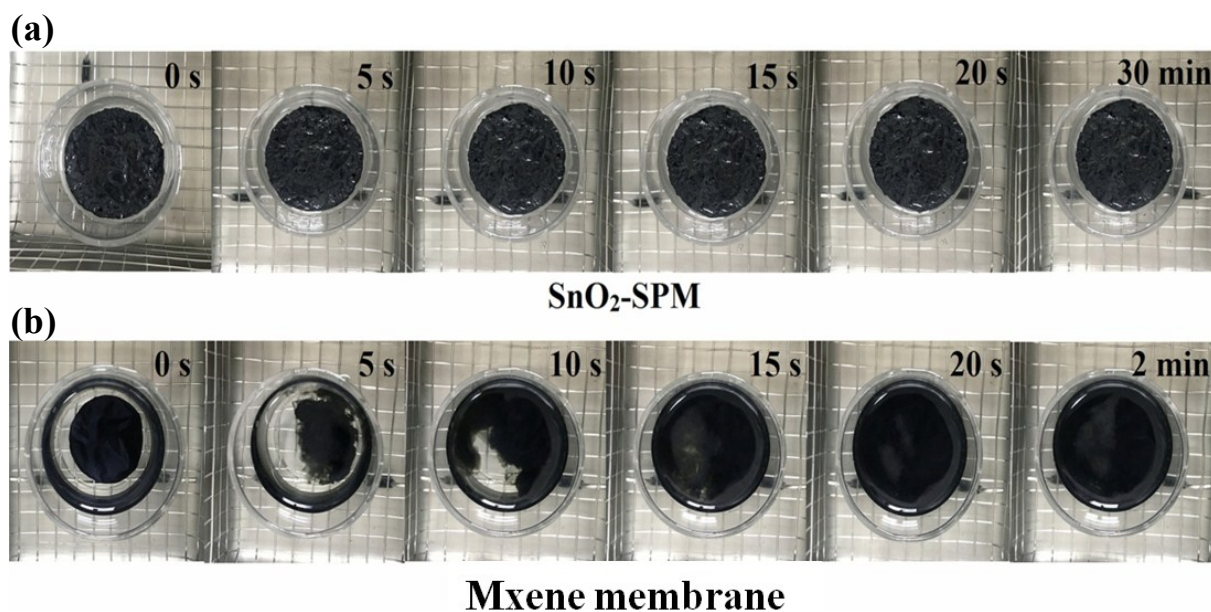

**Fig. S15** Video snapshots of (a) the SnO<sub>2</sub>-SPM and (b) the MXene membrane, which was prepared according to the methods reported [1] being soaked in water under bath sonication for different periods. The water tolerant of MXene membrane has a poor long-term stability in water. Fortunately, our lightweight SnO<sub>2</sub>-SPM floating on the water retained the perfect structural integrity after the bath sonication for 30 min, whereas the MXene membrane sank to the bottom of the container and started to decompose when it was sonicated for 5 s under the same conditions, and it completely disintegrated within 20 s.

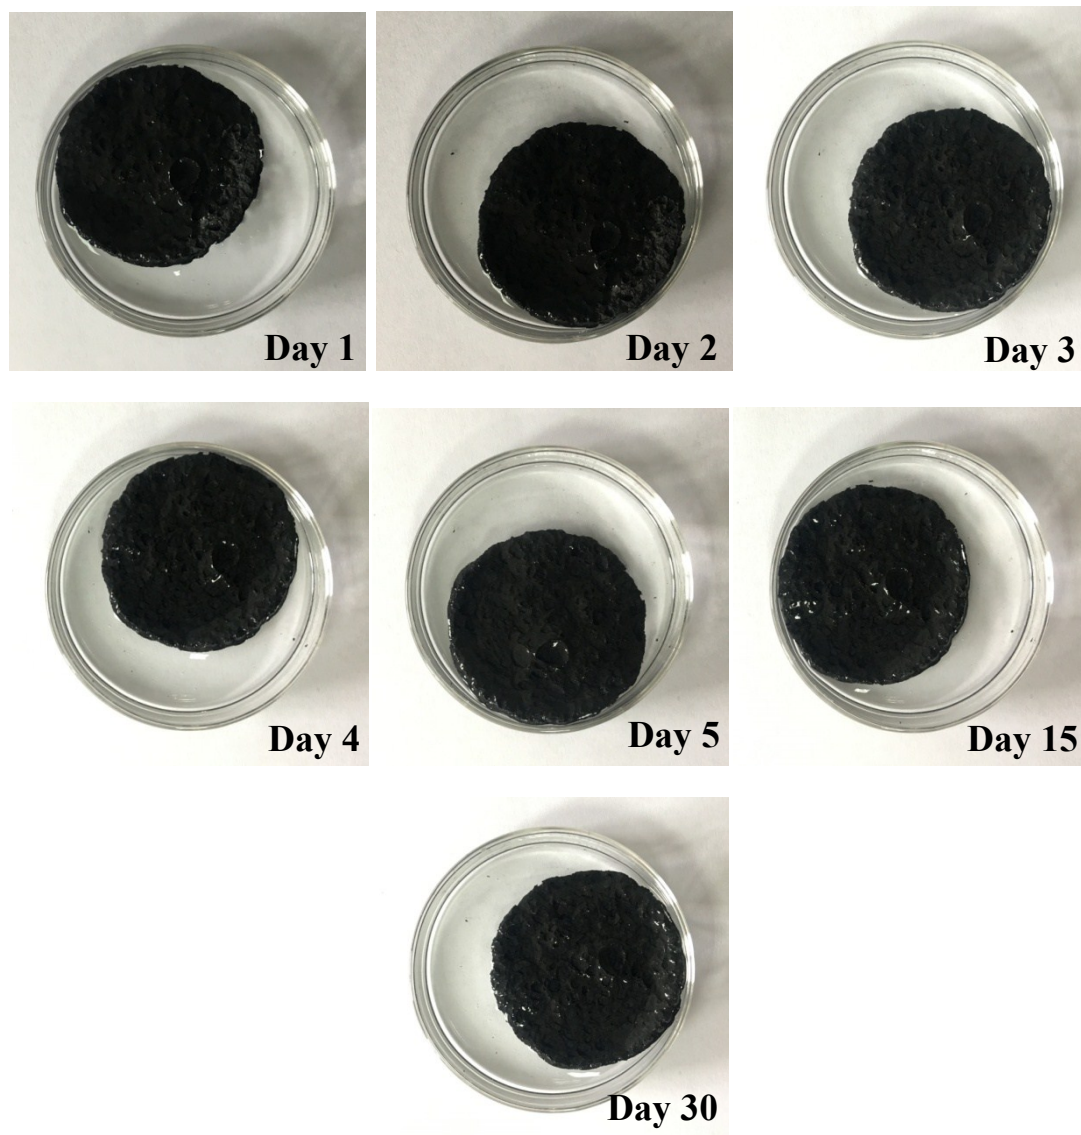

**Fig. S16** Digital photos showing the long-term stability by soaking the SnO<sub>2</sub>-SPM into water for 30 d.

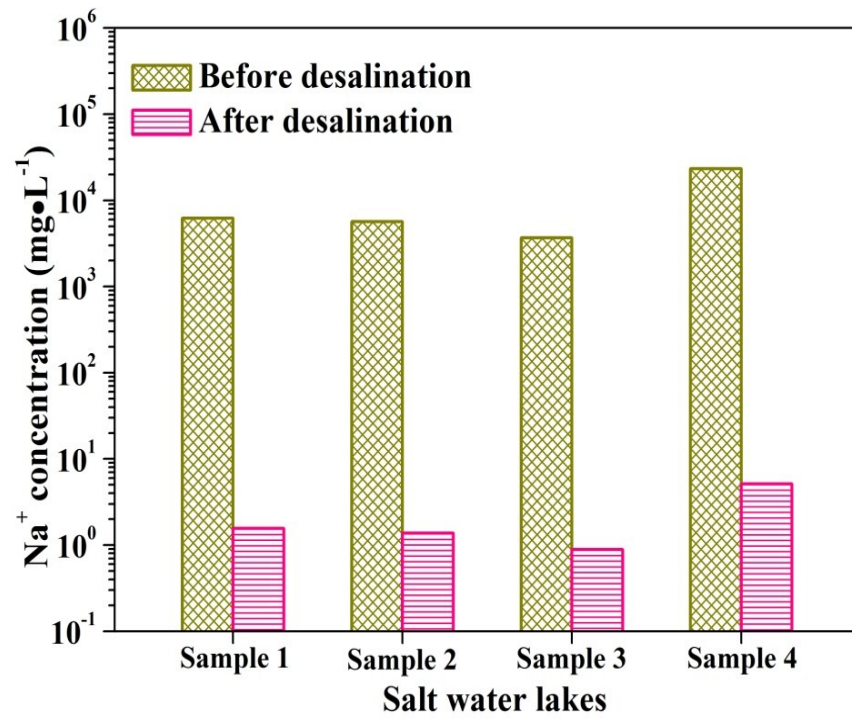

**Fig. S17** Na<sup>+</sup> concentrations of four actual salt water lakes (Tibet, China) before and after desalination.



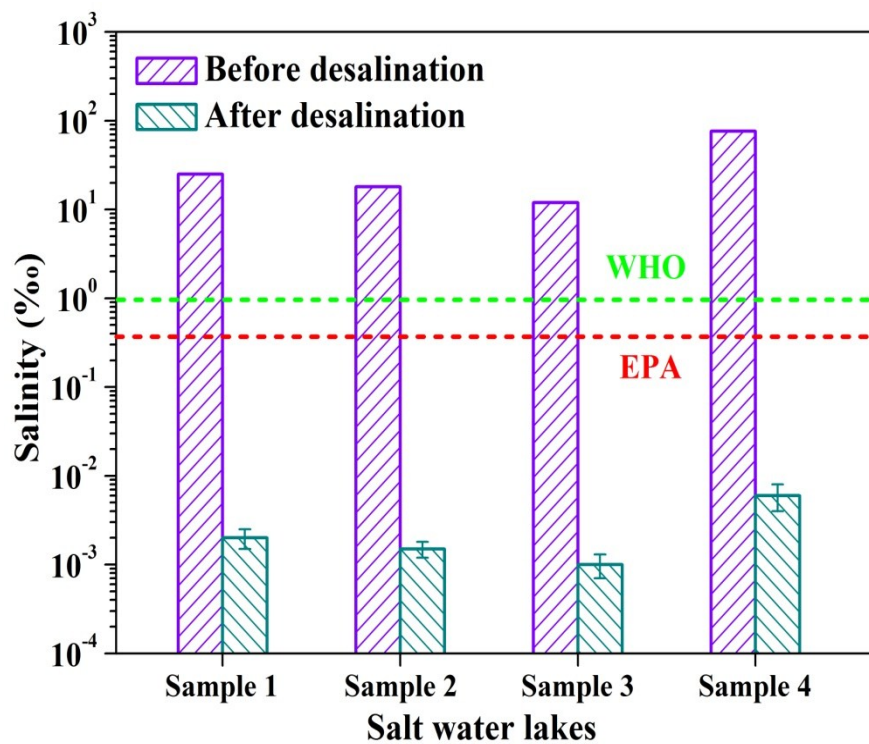

**Fig. S18** The salinities of four brackish water samples before and after desalination using SnO<sub>2</sub>-SPM<sub>2.1</sub>. The broken lines refer to the World Health Organization (WHO, green line) and US Environmental Protection Agency (EPA, red line) salinity standards for drinkable water.

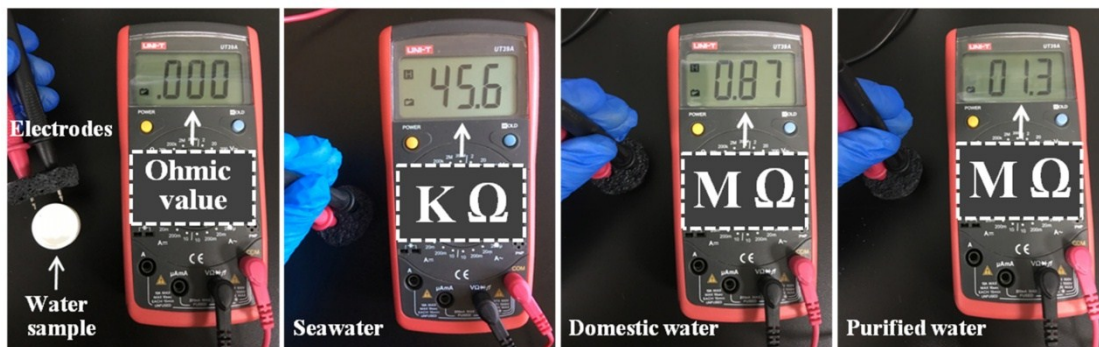

**Fig. S19** Evaluation of water purity using a multimeter with a constant distance between electrodes. The results demonstrated a high purity of purified water, similar to that of domestic water.

**Table S1.** Water quality parameters of four actual seawaters and salt water lakes.

|                                                                  | <b>Yellow sea</b> | <b>Bohai sea</b> | <b>East China sea</b> | <b>South China sea</b> | <b>Salt water lake 1</b> | <b>Salt water lake 2</b> | <b>Salt water lake 3</b> | <b>Salt water lake 4</b> |
|------------------------------------------------------------------|-------------------|------------------|-----------------------|------------------------|--------------------------|--------------------------|--------------------------|--------------------------|
| <b>pH</b>                                                        | 7.9               | 7.9              | 7.8                   | 7.8                    | 9.4                      | 9.7                      | 9.6                      | 9.3                      |
| <b>Salinity</b><br>(‰)                                           | 31.0              | 30.0             | 32.0                  | 35.0                   | 25.0                     | 18.0                     | 12.0                     | 76.0                     |
| <b>Basicity</b><br>(mmol•L <sup>-1</sup> )                       | 20.4              | 21.7             | 18.7                  | 22.1                   | 37.2                     | 106.2                    | 36.3                     | 87.7                     |
| <b>HCO<sub>3</sub><sup>-</sup></b><br>(mmol•L <sup>-1</sup> )    | 15.4              | 18.4             | 16.7                  | 17.9                   | 6.5                      | 34.3                     | 12.1                     | 12.5                     |
| <b>1/2CO<sub>3</sub><sup>2-</sup></b><br>(mmol•L <sup>-1</sup> ) | 5.0               | 3.3              | 2.0                   | 4.2                    | 30.7                     | 71.9                     | 24.2                     | 75.2                     |
| <b>Hardness</b><br>(mmol•L <sup>-1</sup> )                       | 112.8             | 109.9            | 112.9                 | 113.8                  | 83.2                     | 37.2                     | 56.0                     | 16.8                     |
| <b>Turbidity</b><br>(NTU)                                        | 0.5               | 11.8             | 16.3                  | 1.1                    | 0.2                      | 1.7                      | 1.1                      | 15.7                     |

Because  $\text{Ti}_3\text{C}_2$  as the light-to-heat conversion materials was coated on sponge substrate, the concentration of  $\text{Ti}_3\text{C}_2$  played an important role in solar-driven desalination. To evaluate the effect of the loading concentration of  $\text{Ti}_3\text{C}_2$  on the evaporation performance, the energy conversion efficiency was investigated by measuring the water evaporation rate of  $\text{SnO}_2$ -SPM with different  $\text{Ti}_3\text{C}_2$  loading concentration (0.5, 1.0, 1.5, 2.0 and 2.5  $\text{mg}\cdot\text{mL}^{-1}$ , denoted by  $\text{SnO}_2\text{-SPM}^{0.5}$ ,  $\text{SnO}_2\text{-SPM}^{1.0}$ ,  $\text{SnO}_2\text{-SPM}^{1.5}$ ,  $\text{SnO}_2\text{-SPM}^{2.0}$  and  $\text{SnO}_2\text{-SPM}^{2.5}$ , respectively.). After the light was turned on, the water mass changed because of the vapor production was recorded by a balance. The typical curves of time-dependent mass change were provided in Fig. S20. The  $\text{SnO}_2\text{-SPM}^{2.0}$  exhibited a water evaporation rate of  $1.41 \text{ kg}\cdot\text{m}^{-2}\cdot\text{h}^{-1}$  under 1-sun irradiation. By contrast, the water evaporation rate of  $\text{SnO}_2\text{-SPM}^{0.5}$ ,  $\text{SnO}_2\text{-SPM}^{1.0}$ ,  $\text{SnO}_2\text{-SPM}^{1.5}$  and  $\text{SnO}_2\text{-SPM}^{2.5}$  was 1.15, 1.28, 1.35, and  $1.41 \text{ kg}\cdot\text{m}^{-2}\cdot\text{h}^{-1}$ , respectively (Fig. S21). The solar energy conversion efficiency of absorbers was another important parameter to evaluate the performance of steam generation. As shown in Fig. S21, the water evaporation rate and thermal efficiency gradually increased with the  $\text{Ti}_3\text{C}_2$  concentration increasing. However, when the concentration of  $\text{Ti}_3\text{C}_2$  was up to  $2.0 \text{ mg}\cdot\text{mL}^{-1}$ , the evaporation rate and thermal efficiency were almost unchanged even if the  $\text{Ti}_3\text{C}_2$  concentration was further increased. Hence,  $2.0 \text{ mg}\cdot\text{mL}^{-1}$  of  $\text{Ti}_3\text{C}_2$  was selected for the following experiments unless otherwise specified.

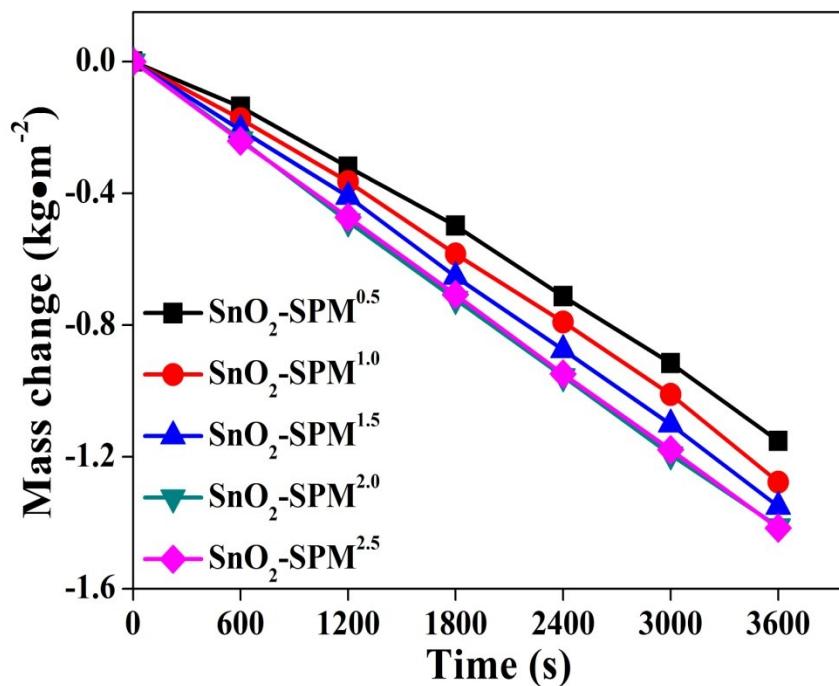

**Fig. S20** Mass change of seawater over time by using SnO<sub>2</sub>-SPM<sup>0.5</sup>, SnO<sub>2</sub>-SPM<sup>1.0</sup>, SnO<sub>2</sub>-SPM<sup>1.5</sup>, SnO<sub>2</sub>-SPM<sup>2.0</sup> and SnO<sub>2</sub>-SPM<sup>2.5</sup> under 1-sun irradiation.

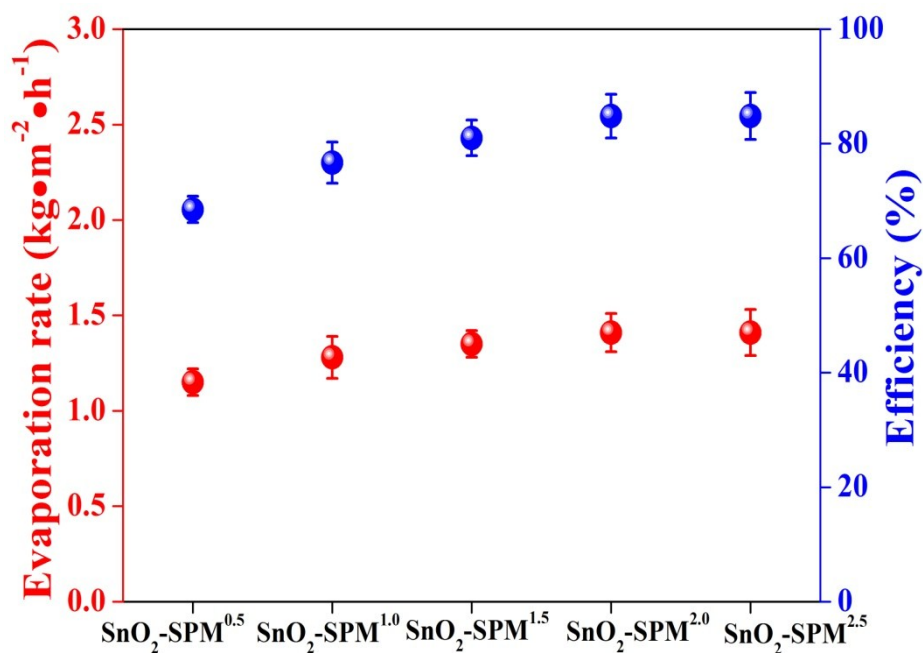

**Fig. S21** Thermal efficiency and corresponding evaporation rate for SnO<sub>2</sub>-SPM<sup>0.5</sup>, SnO<sub>2</sub>-SPM<sup>1.0</sup>, SnO<sub>2</sub>-SPM<sup>1.5</sup>, SnO<sub>2</sub>-SPM<sup>2.0</sup> and SnO<sub>2</sub>-SPM<sup>2.5</sup> under 1-sun irradiation.

## References

1. R. Y. Li, L. B. Zhang, L. Shi, P. Wang, *ACS Nano*, 2017, **11**, 3752–3759.
